# Supplementary material for: Synthesis of a water-soluble hexameric metallomacrocycle and its oxidized single-wall carbon nanotube composite
Source: Royal Society of Chemistry journal article supplement (doi:10.1039/b702797d), 2007-01-01
Supplement: b702797d.pdf [file b702797d.pdf]

## Supporting Information:

### Synthesis of a water-soluble hexametallomacrocycle and its oxidized single-wall carbon nanotube composite

Pingshan Wang,<sup>1</sup> Charles N. Moorefield,<sup>4</sup> Sinan Li,<sup>2</sup> Juan Manriquez,<sup>5</sup> Carol D. Shreiner,<sup>1</sup> Erika Bustos,<sup>5</sup> Aaron L. Hartley,<sup>3</sup> Luis A. Godínez,<sup>5</sup> George R. Newkome\*<sup>1,3</sup>

*Departments of Polymer Science,<sup>1</sup> Polymer Engineering,<sup>2</sup> Maurice Morton Institute of Polymer Science,<sup>4</sup> Chemistry,<sup>3</sup> The University of Akron, Akron, OH 44325-4717*

*Centro de Investigación y Desarrollo Tecnológico en Electroquímica,<sup>5</sup> Querétaro, 76700, México*

#### Table of Contents

| Contents                                                                                 | Page |
|------------------------------------------------------------------------------------------|------|
| Table of Contents                                                                        | S1   |
|                                                                                          |      |
| <i>Figure S1.</i> TEM of the Oxi-SWNT.                                                   | S2   |
| <i>Figure S2.</i> AFM of the [(Oxi-SWNT) <sub>n</sub> 2 <sub>m</sub> ].                  | S2   |
| <i>Figure S3.</i> AFM of the diassociation of [(Oxi-SWNT) <sub>n</sub> 2 <sub>m</sub> ]. | S2   |
| <i>Figure S4.</i> AFM height analysis of the composite                                   | S3   |

**TEM image:**

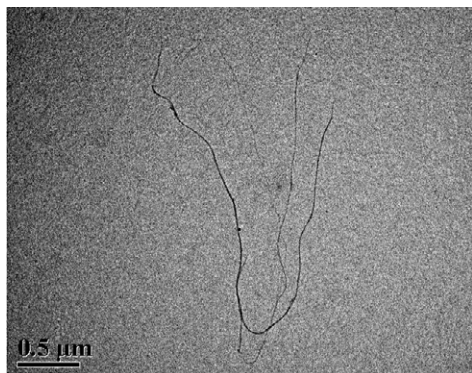

*Figure S1.* TEM of commercial Oxi-SWNT.

**AFM images:**

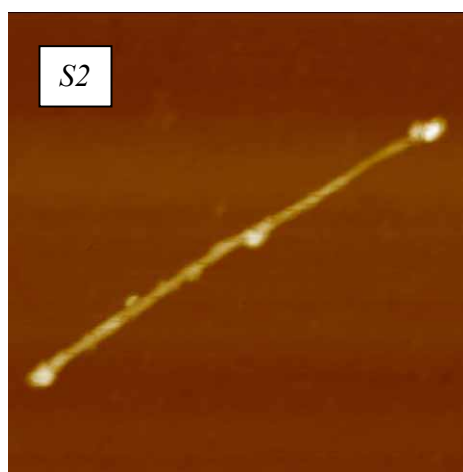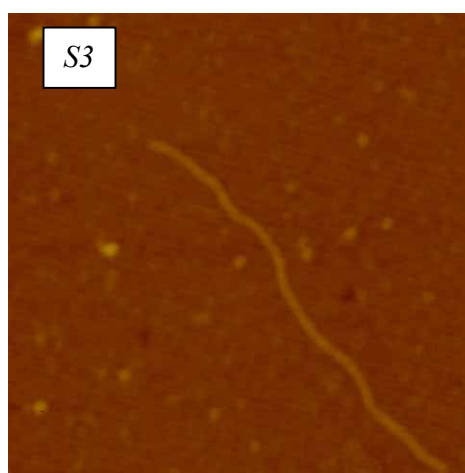

*Figures S2 and S3.* AFMs of the [(Oxi-SWNT)<sub>n</sub>2<sub>m</sub>] composite and the disassociated [(Oxi-SWNT)<sub>n</sub>2<sub>m</sub>] material.

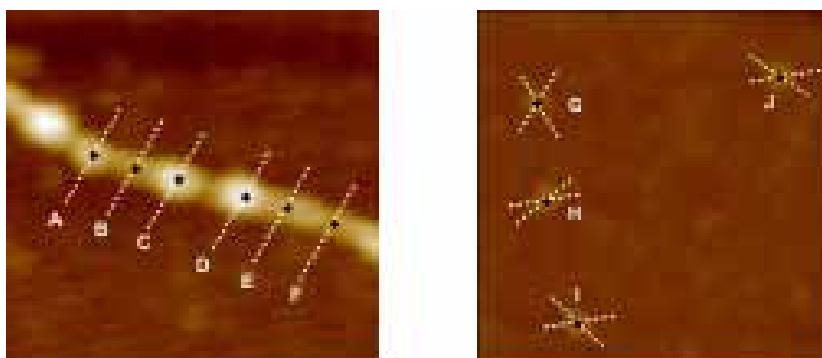

|                | <b>Hexamer 2 in hybrid (nm)</b> |            | <b>CNT in hybrid (nm)</b> |
|----------------|---------------------------------|------------|---------------------------|
| <b>(A)</b>     | <b>2.114</b>                    | <b>(B)</b> | <b>1.232</b>              |
| <b>(C)</b>     | <b>2.263</b>                    | <b>(E)</b> | <b>1.404</b>              |
| <b>(D)</b>     | <b>2.375</b>                    | <b>(F)</b> | <b>1.389</b>              |
| <b>average</b> | <b>2.2506</b>                   |            | <b>1.3536</b>             |

| <b>Height</b>  | <b>Hexamer 2 (nm)</b> |
|----------------|-----------------------|
| <b>(G)</b>     | <b>0.800</b>          |
| <b>(H)</b>     | <b>0.906</b>          |
| <b>(I)</b>     | <b>0.902</b>          |
| <b>(J)</b>     | <b>0.863</b>          |
| <b>average</b> | <b>0.8723</b>         |

*Figure S4.* Section analysis of the AFM was used to measure the vertical distance in the cross section of each dashed line on the topographical images. Arithmetic mean of the heights, measured from the highest point (black dot) of the subject to the horizontal surface, is used as the average height value.
